# Supplementary material for: Single-Nucleotide Polymorphisms Sequencing Identifies Candidate Functional Variants at Prostate Cancer Risk Loci
Source: MDPI journal article supplement (doi:10.3390/genes10070547), 2019-07-18
Supplement: s1 [file s1]

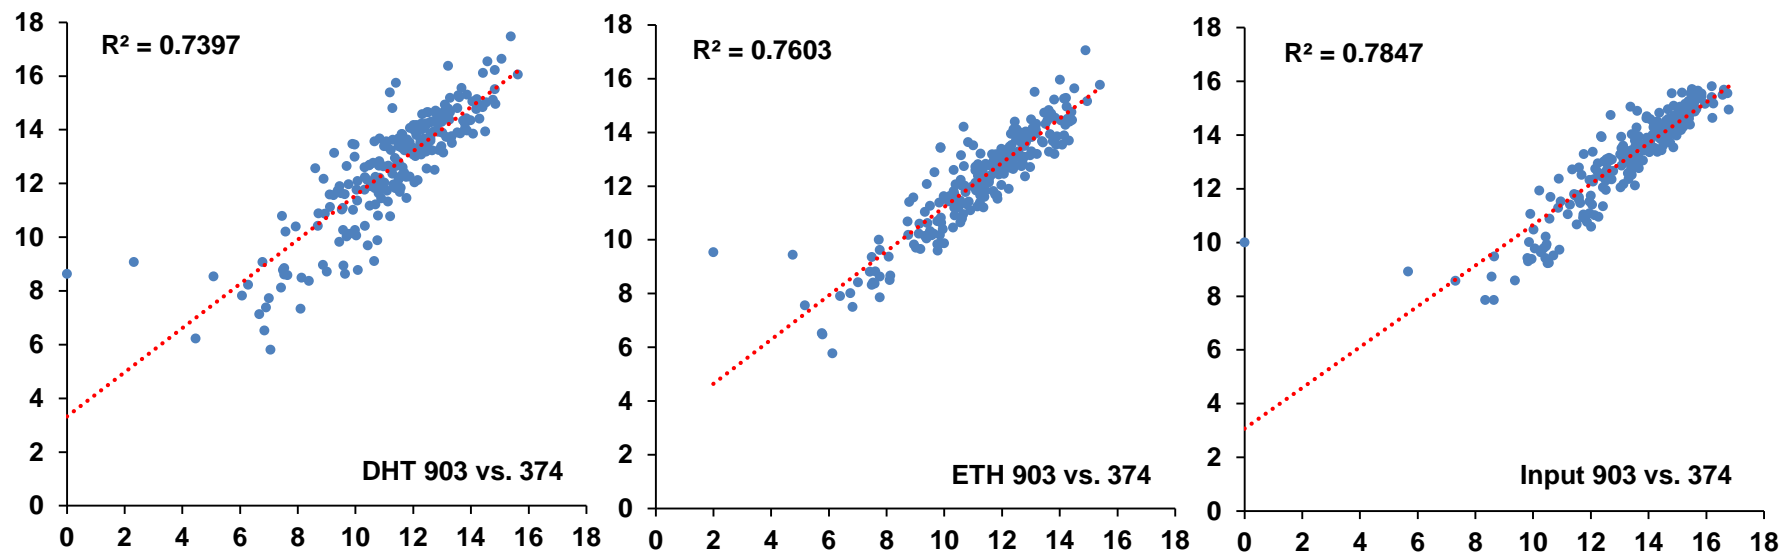

**Figure S1.** The correlation of log<sub>2</sub> read count in overlapped SNPs between this study (903 SNPs) and previous SNPs-seq (374 SNPs). 116 SNPs are shared between the two studies.

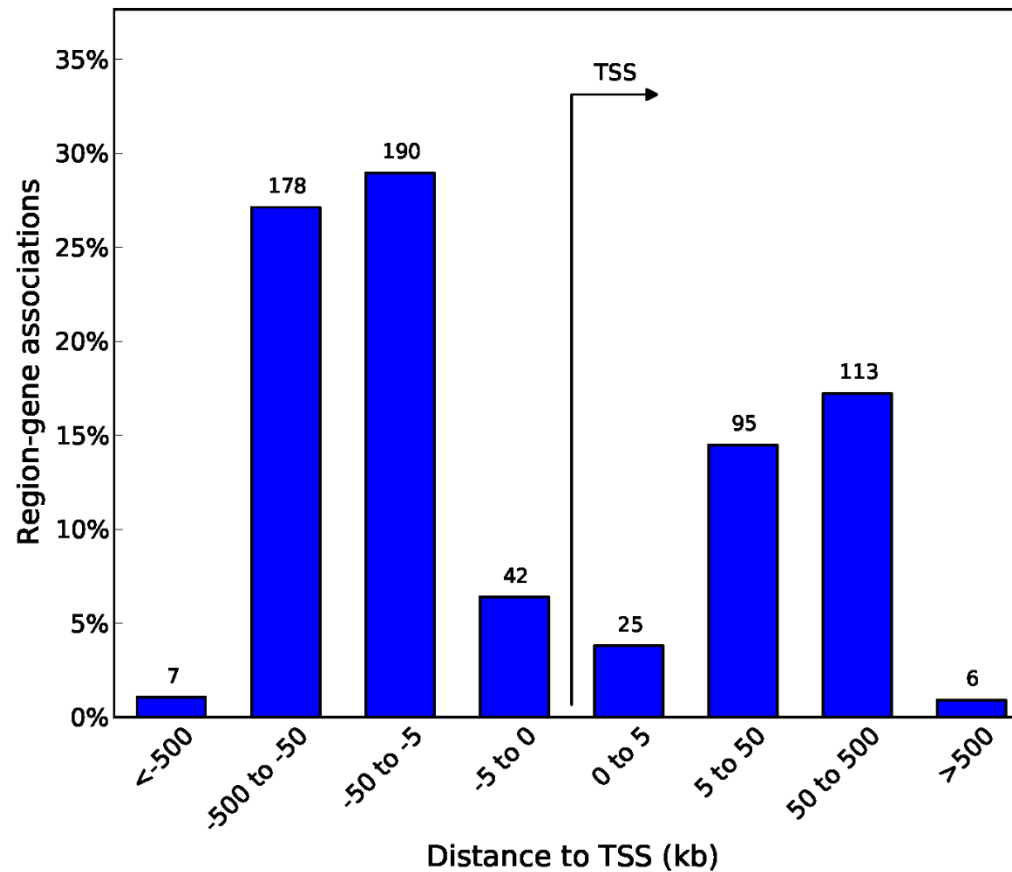

**Figure S2.** Distance of selected 348 SNPs to transcription start site (TSS) of the nearby genes.

**Figure S3.** Circos Plot showing functional annotations on the 348 SNPs. Left semicircle: from outer to inner ring are chromosomes and related SNPs, genes, and Regulome DB score  $\leq 4$ . Right semicircle: Histone and transcription factor marks from HaploReg, SNPnexus, and VEP.

See Tif file

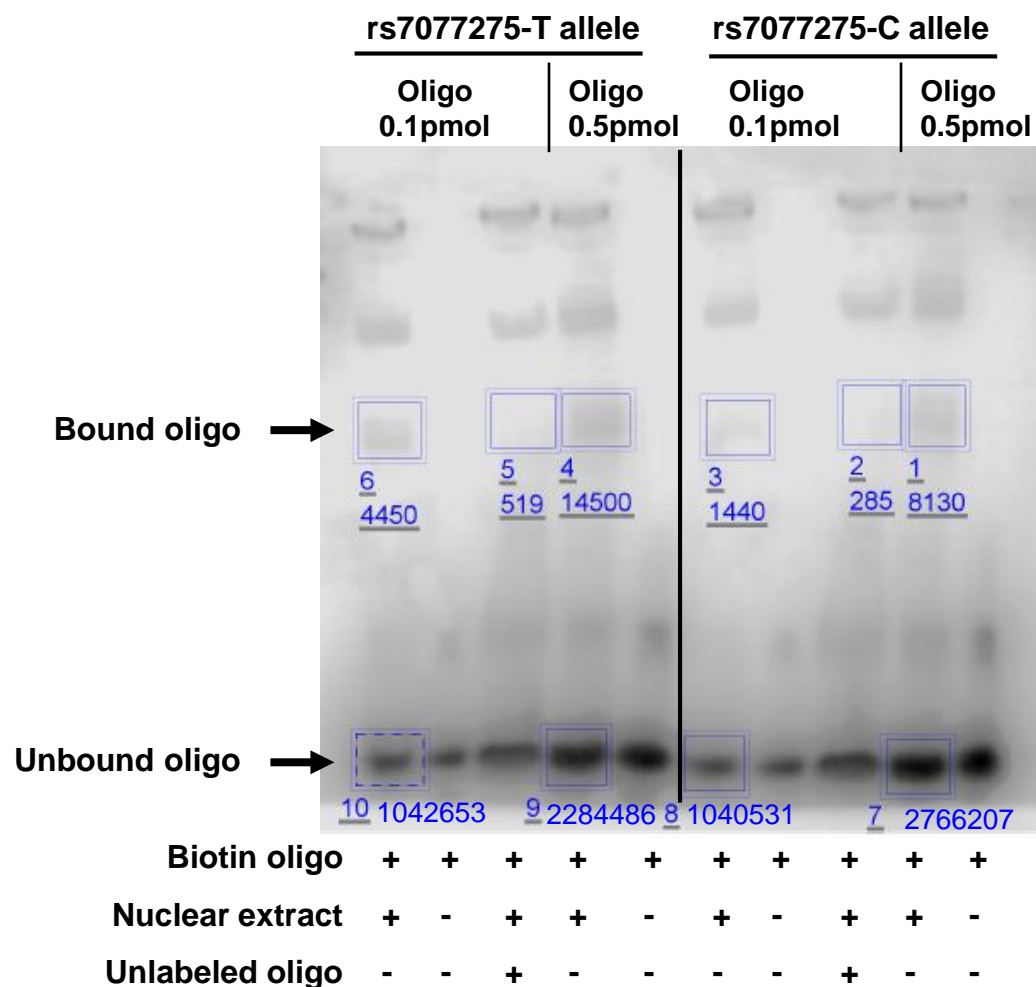

| Bound/Unbound oligo | Bound/Unbound oligo | C/T Gel shift 0.1pmol   | C/T Gel shift 0.5pmol   |
|---------------------|---------------------|-------------------------|-------------------------|
| C 0.1pmol           | C 0.5pmol           | 0.326                   | 0.460                   |
| 0.0014              | 0.0029              |                         |                         |
| T 0.1pmol           | T 0.5pmol           | <b>C/T SNPs-seq DHT</b> | <b>C/T SNPs-seq ETH</b> |
| 0.0043              | 0.0063              | 0.496                   | 0.573                   |

**Figure S4.** Validation of SNP rs7077275 by EMSA. Compared to T allele, C allele shows weaker protein binding in both 0.1 pmol or 0.5 pmol oligo. The binding signal is reduced by addition of unlabeled oligos. The ratio of C to T allele from EMSA is consistent with ratio from SNPs-seq.

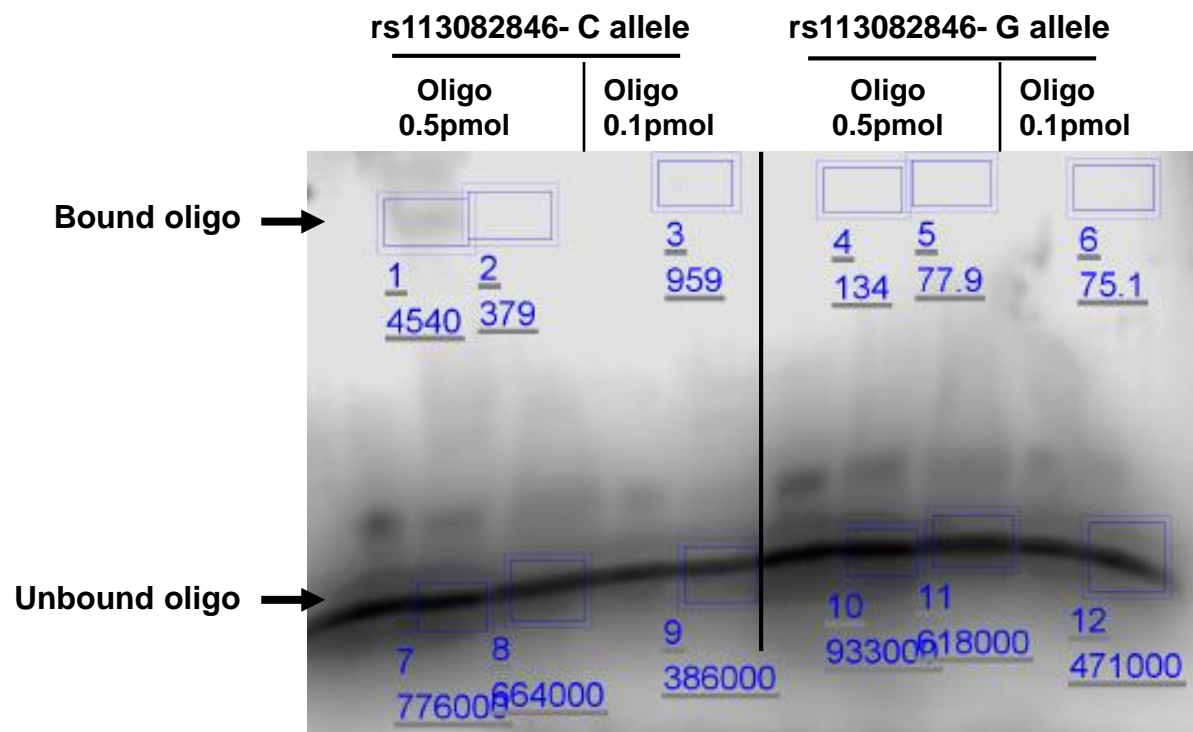

|                 |   |   |   |   |   |   |   |   |   |   |
|-----------------|---|---|---|---|---|---|---|---|---|---|
| Biotin oligo    | + | + | + | + | + | + | + | + | + | + |
| Nuclear extract | - | + | + | - | + | - | + | + | - | + |
| Unlabeled oligo | - | - | + | - | - | - | - | + | - | - |

| Bound/Unbound oligo | Bound/Unbound oligo | C/G gel shift 0.5pmol | C/G gel shift 0.1pmol |
|---------------------|---------------------|-----------------------|-----------------------|
| C 0.5pmol           | C 0.1pmol           | 42.143                | 15.625                |
| 0.0059              | 0.0025              |                       |                       |
| G 0.5pmol           | G 0.1pmol           | C/G SNPs-seq DHT      | C/G SNPs-seq ETH      |
| 0.00014             | 0.00016             | 7.752                 | 8.786                 |

**Figure S5.** Validation of SNP rs113082846 by EMSA. Compared to G allele, C allele shows stronger protein binding in both 0.5 pmol or 0.1 pmol oligo. The binding signal is reduced by addition of unlabeled oligos. The ratio of C to G allele from EMSA is consistent with ratio from SNPs-seq.

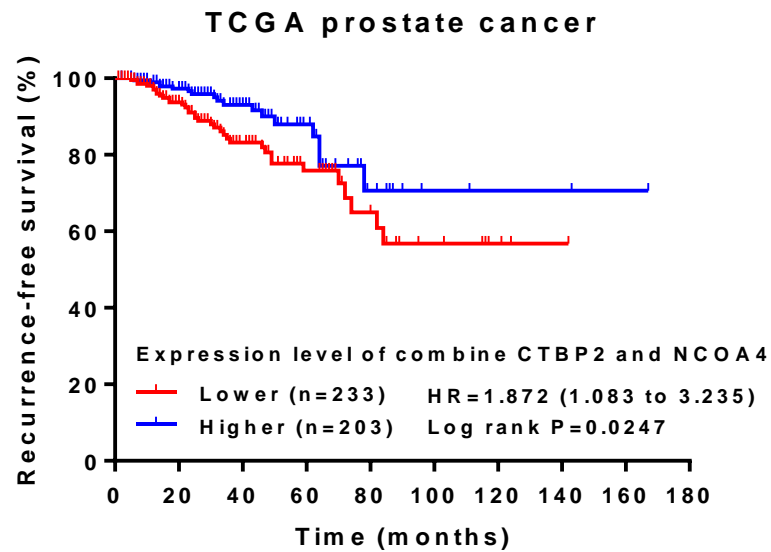

**Figure S6.** Association of RFS with combined expression value of CTBP2 and NCOA4 by Log-rank test.

**Table S1.**

List of 903 SNPs, sequence read count, and BAB score.

See Excel file

**Table S2.** Priority of SNPs selection based on BAB score.

| Absolute<br>BAB score | Ratio<br>fold | DHT   |          | Overlap | ETH   |          |
|-----------------------|---------------|-------|----------|---------|-------|----------|
|                       |               | total | specific |         | total | specific |
| ≥2.32                 | 5             | 25    | 5        | 20      | 33    | 13       |
| ≥2                    | 4             | 28    | 12       | 16      | 25    | 9        |
| ≥1.58                 | 3             | 51    | 19       | 32      | 58    | 26       |
| ≥1                    | 2             | 135   | 42       | 93      | 132   | 39       |
| ≥0.58                 | 1.5           | 141   | 50       | 91      | 155   | 64       |
| Total                 |               | 380   | 32       | 348     | 403   | 55       |



**Table S3.**

Functional analysis of 348 significant SNPs using Regulome DB, HaploReg, SNPnexus, VEP and MATCH datasets.

See Excel file

**Table S4.** Functional annotations of 3 validated SNPs.

| SNP         | Gene  | Regulome<br>DB score | Histone marks                                                                                  | TF marks                                                                                         | Motif changes                                                                                                                    |
|-------------|-------|----------------------|------------------------------------------------------------------------------------------------|--------------------------------------------------------------------------------------------------|----------------------------------------------------------------------------------------------------------------------------------|
| rs12246440  | CTBP2 | 4                    | H4K20me1, H3K79me2,<br>H3K4me1, H3K36me3,<br>H3K27me3, H3K14ac,<br>H3K27ac, H2AK5ac,<br>H4K8ac | CTCF, USF1, RAD21,<br>JUND, YY1, GABP,<br>SMC3, ZNF143,<br>ATF3, BCL3, CJUN,<br>CMYC, CTCFL, MAX | AP-1, AP-2, BAF155,<br>BATF, BCL, Bach1,<br>Bach2, GATA, GR,<br>HMGN3, KAP1, Maf,<br>Mef2, Myc, PRDM1,<br>RXRA, STAT, TCF4, p300 |
| rs7077275   | CTBP2 | 2b                   | H3K36me3, H4K20me1,<br>H3K27me3, H3K4me1,<br>H3K27ac, H3K79me2                                 | AR                                                                                               | ATF3, CTCF, RXRA,<br>Rad21, SIX5, SMC3,<br>TBX5, Tgif1                                                                           |
| rs113082846 | NCOA4 | 3a                   | H3K4me1, H3K27ac,<br>H3K9ac, H3K27me3,<br>H3K4me3                                              | POU2F2, RUNX3                                                                                    | BCL, ELF1, Ets, PLAG1,<br>RREB1, TATA                                                                                            |
